# Supplementary material for: Comparison of different silica microporous structures as drug delivery systems for in vitro models of solid tumors
Source: Royal Society of Chemistry journal article supplement (doi:10.1039/c7ra01028a), 2017-01-01
Supplement: c7ra01028a1.pdf [file c7ra01028a1.pdf]

## Supplementary Information

### Comparison of different silica microporous structures as drug delivery systems for *in vitro* models of solid tumors

Natália Vilaça, Ana F. Machado, Filipa Morais-Santos, Ricardo Amorim, Patrícia Neto, Enora Logodin, Manuel F.R. Pereira, Mariana Sardo, João Rocha, Pier Parpot, António M. Fonseca, Fátima Baltazar and Isabel C. Neves

#### Supplementary Figures

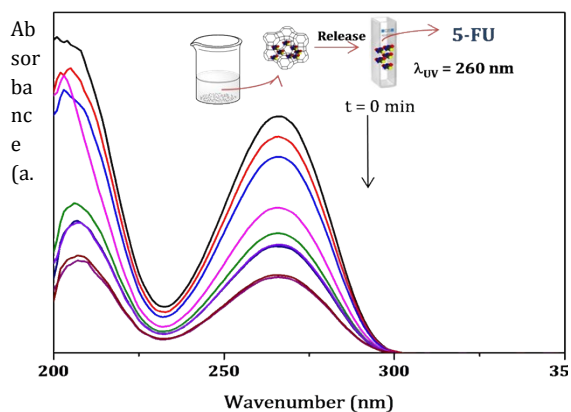

Fig. S1 UV/vis spectra of 5-FU release from 5-FU@NaY up to 60 min.

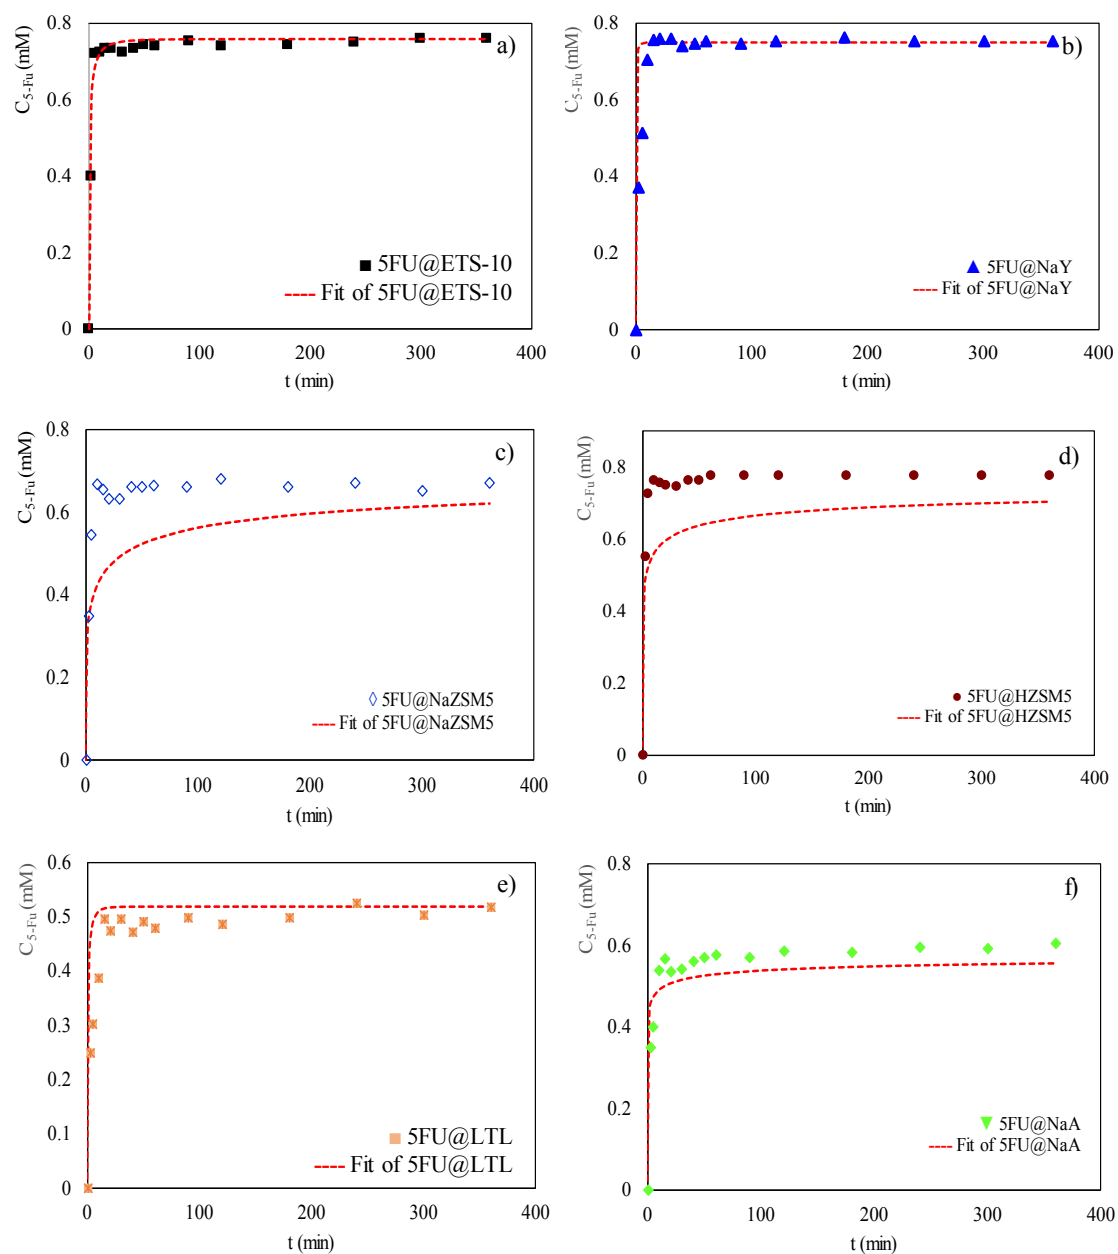

**Fig. S2** Release profiles of a) 5-FU@ETS-10, b) 5-FU@NaY, c) 5-FU@NaZSM5, d) 5-FU@HZSM5, e) 5-FU@LTL and f) 5-FU@NaA in buffer solution at pH = 7.4 and 37 °C. Release measurements were conducted in triplicate and the concentration values were averaged. The solid points and dotted lines show the Weibull model fits to the respective data sets with fit parameters listed in Table 2 (see the manuscript).

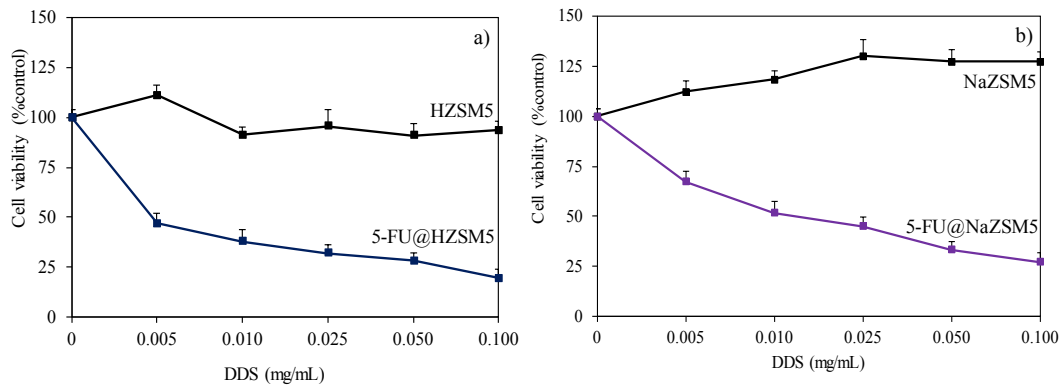

**Fig. S3** Effect of HZSM5 a) and NaZSM5 b) hosts and DDS systems on RKO colon carcinoma cell viability. RKO cells were incubated with hosts and different DDS concentrations for 48 h. Cell viability was measured by the SRB assay. Values are means  $\pm$  SD of three independent experiments, each performed in triplicate. \* $p < 0.05$ , \*\*\* $p < 0.001$  compared to host alone.

The cell viability results for NaY and LTL hosts are already published in the reference 4 in the manuscript.

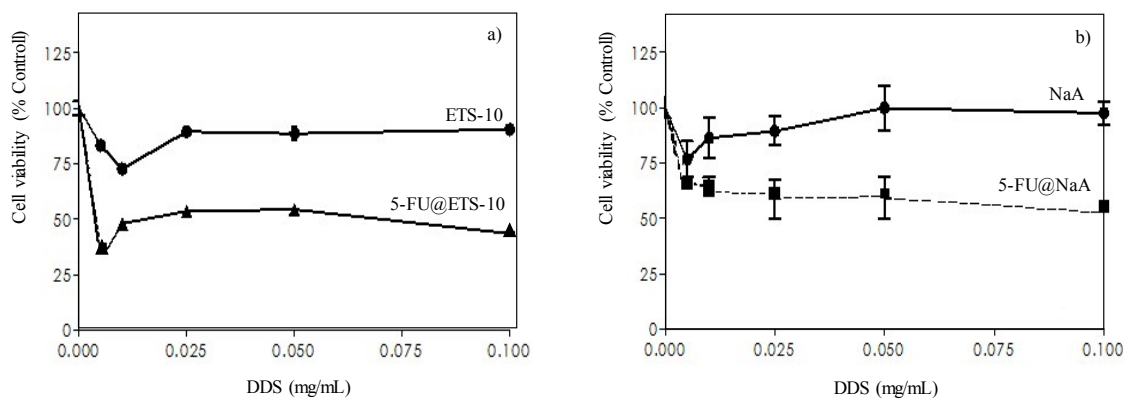

**Fig. S4** Effect of ETS-10 a) and NaA b) hosts and DDS systems on MDA-MB-468 breast carcinoma cell viability. MDA-MB-468 cells were incubated with hosts and different DDS concentrations for 48 h. Cell viability was measured by the SRB assay. Values are means  $\pm$  SD of three independent experiments, each performed in triplicate. \* $p < 0.05$ , \*\*\* $p < 0.001$  compared to host alone.
